# Supplementary material for: CAREX Canada: an enhanced model for assessing occupational carcinogen exposure
Source: PubMed Central journal article supplement — Occup Environ Med. 2014 Jun 26;72(1):64–71. doi: 10.1136/oemed-2014-102286 (PMC4283677; doi:10.1136/oemed-2014-102286), 2014-06-26
Supplement: oemed-2014-102286-s1.pdf [file oemed-2014-102286-s1.pdf]

Supplementary (online only) data for:

“CAREX Canada: An enhanced model for assessing occupational carcinogen exposure.”

Cheryl E. Peters<sup>1,2</sup>, Calvin B. Ge<sup>2</sup>, Amy L. Hall<sup>1</sup>, Hugh W. Davies<sup>1</sup>, Paul A. Demers<sup>3,4</sup>

1. School of Population and Public Health, University of British Columbia, Vancouver, Canada
2. CAREX Canada, Faculty of Health Sciences, Simon Fraser University, Burnaby, Canada
3. Occupational Cancer Research Centre, Cancer Care Ontario, Toronto, Canada
4. Dalla Lana School of Public Health, University of Toronto, Toronto, Canada

Corresponding author: CE Peters, [cepeters@mail.ubc.ca](mailto:cepeters@mail.ubc.ca)

**Table S1: Proportion of men exposed by agent in CAREX Canada**

| Agent                                              | % men | n exposed at work |
|----------------------------------------------------|-------|-------------------|
| Antineoplastic Agents                              | 27.0  | 58,000            |
| Ethylene oxide                                     | 37.7  | 2,400             |
| Chloroform                                         | 49.0  | 15,000            |
| Shift work with potential for circadian disruption | 55.6  | 1,900,000         |
| 1,4-Dioxane                                        | 56.8  | 3,700             |
| Ionizing radiation                                 | 57.0  | 37,000 – 78,000   |
| Tetrachloroethylene                                | 60.4  | 15,000            |
| Trichloroethylene                                  | 63.9  | 9,800             |
| Formaldehyde                                       | 66.1  | 151,000           |
| Acrylonitrile                                      | 67.8  | 5,900             |
| Acetaldehyde                                       | 68.4  | 8,600             |
| Epichlorohydrin                                    | 73.2  | 6,600             |
| Toluene diisocyanates (TDIs)                       | 75.1  | 24,000            |
| Nitrobenzene                                       | 76.3  | 500               |
| 1,2-Dichloroethane                                 | 76.3  | 2,000             |
| Polycyclic aromatic hydrocarbons (PAHs)            | 76.7  | 350,000           |
| UV radiation (artificial sources)                  | 78.3  | 141,000           |
| Antimony trioxide                                  | 78.9  | 9,700             |
| Pentachlorophenol                                  | 81.5  | 4,300             |
| Solar radiation                                    | 82.4  | 1,476,000         |
| Dichloromethane                                    | 82.7  | 20,000            |
| Styrene                                            | 83.7  | 89,000            |
| 1,3-Butadiene                                      | 83.8  | 3,900             |
| Cobalt                                             | 85.2  | 33,000            |
| Beryllium                                          | 86.0  | 3,900             |
| Refractory ceramic fibers (RCFs)                   | 86.5  | 3,200             |
| Benzene                                            | 87.4  | 374,000           |
| Lead                                               | 89.6  | 277,000           |
| Acrylamide                                         | 89.7  | 9,300             |
| Cadmium                                            | 90.0  | 31,000            |
| Arsenic                                            | 90.5  | 25,000            |
| Naphthalene                                        | 90.6  | 7,700             |
| Nickel                                             | 91.1  | 117,000           |
| Chromium (hexavalent)                              | 91.7  | 104,000           |
| Diesel engine exhaust                              | 91.7  | 781,000           |
| Wood dust                                          | 92.7  | 338,000           |
| Silica (crystalline)                               | 92.8  | 382,000           |
| Vanadium pentoxide                                 | 93.1  | 7,100             |
| Creosotes                                          | 93.4  | 4,800             |
| Coal tar and coal tar pitches                      | 93.4  | 7,600             |
| Ethylbenzene                                       | 93.5  | 208,000           |
| Bitumens                                           | 95.0  | 44,000            |
| Asbestos                                           | 96.3  | 151,000           |
| Polychlorinated biphenyls (PCBs)                   | 96.7  | 8,200             |

**Table S2: Exposure to CAREX agents by broad occupational category**

| <b>Occupational groups: NOC-S 2006 codes</b>                                                                        | <b>Total employed (n)</b> | <b>Number of exposures</b> | <b>Exposures per worker</b> | <b>Top exposures</b> |
|---------------------------------------------------------------------------------------------------------------------|---------------------------|----------------------------|-----------------------------|----------------------|
| Transport and equipment operators: H611 - H737                                                                      | 678,000                   | 1,176,000                  | 1.74                        | DEE, SOL, BENZ       |
| Other trades occupations: H211 - H535                                                                               | 908,000                   | 1,125,000                  | 1.24                        | PB, PAH, UV          |
| Occupations unique to primary industry: I011 - I216                                                                 | 648,000                   | 704,000                    | 1.09                        | SOL, DEE, SHIFT      |
| Machine operators and assemblers in manufacturing, including supervisors: J011 - J228                               | 726,000                   | 684,000                    | 0.94                        | SHIFT, BENZ, FORM    |
| Construction trades: H111 - H145                                                                                    | 436,000                   | 583,000                    | 1.34                        | WOOD, SOL, SILI      |
| Trades helpers, construction and transportation labourers: H811 - H832                                              | 402,000                   | 481,000                    | 1.20                        | SOL, SILI, SHIFT     |
| Sales and service occupations: G013 - G016, G711 - G732, G911 - G983                                                | 1,474,000                 | 316,000                    | 0.21                        | SHIFT, PAH, SOL      |
| Occupations in protective services: G611 - G631                                                                     | 277,000                   | 304,000                    | 1.10                        | SHIFT, PB, SOL       |
| Chefs and cooks, and servers: G012, G411-G513                                                                       | 551,000                   | 284,000                    | 0.52                        | SHIFT, PAH, FORM     |
| Retail salespersons, sales clerks, cashiers: G011, G211 - G311                                                      | 1,123,000                 | 269,000                    | 0.24                        | SHIFT, PAH           |
| Labourers in processing, manufacturing, and utilities: J311 - J319                                                  | 267,000                   | 211,000                    | 0.79                        | SHIFT, WOOD, FORM    |
| Technical, assisting, and related occupations in health: D211 - D313                                                | 478,000                   | 193,000                    | 0.40                        | SHIFT, UV, FORM      |
| Natural and applied sciences and related occupations: C011 - C183                                                   | 1,108,000                 | 183,000                    | 0.17                        | SOL, SHIFT, SILI     |
| Clerical occupations, including supervisors: B411 - B576                                                            | 1,733,000                 | 181,000                    | 0.10                        | SHIFT, SOL           |
| Professional occupations in health, nurse supervisors, nurses: D011 - D112                                          | 472,000                   | 176,000                    | 0.37                        | SHIFT, ANTI, FORM    |
| Contractors and supervisors in trades and transportation: H011 - H022                                               | 125,000                   | 83,000                     | 0.66                        | ASB, SILI, SOL       |
| Other management occupations: A111 - A392                                                                           | 1,375,000                 | 75,000                     | 0.05                        | SHIFT, SOL, UV       |
| Occupations in art, culture, recreation, sport: F011 - F154                                                         | 502,000                   | 72,000                     | 0.14                        | SHIFT, SOL, CHLF     |
| Occupations in social science, government service, religion: E011 - E039, E211 - E217                               | 746,000                   | 65,000                     | 0.09                        | SHIFT, SOL           |
| Teachers and professors: E111 - E133                                                                                | 668,000                   | 37,000                     | 0.05                        | FORM, SHIFT, WOOD    |
| Financial, Secretarial, Admin occupations: B111 - B318                                                              | 865,000                   | 17,000                     | 0.02                        | SHIFT, SOL           |
| Childcare and home support workers: G811 - G814                                                                     | 260,000                   | 16,000                     | 0.06                        | SHIFT, SOL           |
| Wholesale, technical, insurance, real estate sales specialists, and retail, wholesale and grain buyers: G111 - G134 | 353,000                   | 8,600                      | 0.02                        | SHIFT                |
| Professional occupations in business/finance: B011 - B022                                                           | 428,000                   | 5,400                      | 0.01                        | SHIFT                |
| Senior management Occupations: A011 - A016                                                                          | 219,000                   | 0                          | 0.00                        | n/a                  |

\*DEE: diesel engine exhaust, SOL: solar radiation, WOOD: wood dust, SHIFT: shift work, BENZ: benzene, PAH: polycyclic aromatic hydrocarbons, SILI: silica, FORM: formaldehyde, ANTI: antineoplastic agents, IRAD: ionizing radiation, CHLF: chloroform, ETHB: ethylbenzene, UV: artificial ultraviolet radiation, PB: lead compounds

**Table S3: Top 12 prevalent exposures in Canada by province [n (% of workforce by region)]**

|                                        | Canada              | BC                | AB                | SK               | MB               | ON                | QC               | NB               | NS               | PE               | NL               | NU,<br>NT,<br>YT |
|----------------------------------------|---------------------|-------------------|-------------------|------------------|------------------|-------------------|------------------|------------------|------------------|------------------|------------------|------------------|
| Shift work                             | 1,900,000<br>(11.3) | 263,000<br>(12.0) | 213,000<br>(11.1) | 56,000<br>(10.8) | 65,000<br>(10.8) | 833,000<br>(12.9) | 283,000<br>(7.2) | 51,000<br>(13.6) | 74,000<br>(15.8) | 13,000<br>(17.7) | 47,000<br>(19.4) | n/a*             |
| Solar radiation                        | 1,476,000<br>(8.8)  | 214,000<br>(9.7)  | 225,000<br>(11.7) | 83,000<br>(16.1) | 62,000<br>(10.3) | 449,000<br>(6.9)  | 291,000<br>(7.4) | 42,000<br>(11.2) | 53,000<br>(11.2) | 13,000<br>(17.3) | 35,000<br>(14.5) | 6,000<br>(11.0)  |
| Diesel engine exhaust                  | 781,000<br>(4.6)    | 106,000<br>(4.9)  | 106,000<br>(5.5)  | 32,000<br>(6.1)  | 30,000<br>(5.0)  | 263,000<br>(4.1)  | 177,000<br>(4.5) | 23,000<br>(6.2)  | 22,000<br>(4.7)  | 3,500<br>(4.7)   | 14,000<br>(5.7)  | 3,800<br>(6.9)   |
| Silica, crystalline                    | 382,000<br>(2.3)    | 52,000<br>(2.3)   | 54,000<br>(2.8)   | 12,000<br>(2.3)  | 13,000<br>(2.1)  | 142,000<br>(2.2)  | 78,000<br>(2.0)  | 9,700<br>(2.6)   | 9,900<br>(2.1)   | 1,700<br>(2.3)   | 6,600<br>(2.7)   | 1,800<br>(3.3)   |
| Benzene                                | 374,000<br>(2.2)    | 40,000<br>(1.8)   | 45,000<br>(2.3)   | 11,000<br>(2.2)  | 14,000<br>(2.3)  | 147,000<br>(2.3)  | 93,000<br>(2.4)  | 7,100<br>(1.9)   | 10,000<br>(2.2)  | 1,100<br>(1.5)   | 4,200<br>(1.7)   | 1,000<br>(1.9)   |
| Polycyclic aromatic hydrocarbons (PAH) | 350,000<br>(2.1)    | 48,000<br>(2.2)   | 43,000<br>(2.2)   | 13,000<br>(2.5)  | 14,000<br>(2.4)  | 120,000<br>(1.8)  | 85,000<br>(2.2)  | 8,800<br>(2.3)   | 9,700<br>(2.1)   | 1,600<br>(2.2)   | 5,400<br>(2.2)   | 1,400<br>(2.6)   |
| Wood dust                              | 338,000<br>(2.0)    | 66,000<br>(3.0)   | 35,000<br>(1.8)   | 8,000<br>(1.5)   | 11,000<br>(1.8)  | 92,000<br>(1.4)   | 92,000<br>(2.3)  | 12,000<br>(3.2)  | 11,000<br>(2.4)  | 1,700<br>(2.3)   | 6,100<br>(2.5)   | 1,300<br>(2.4)   |
| Lead and lead compounds                | 277,000<br>(1.6)    | 30,000<br>(1.4)   | 41,000<br>(2.1)   | 9,000<br>(1.7)   | 9,500<br>(1.6)   | 102,000<br>(1.6)  | 66,000<br>(1.7)  | 6,100<br>(1.6)   | 7,100<br>(1.5)   | 900<br>(1.2)     | 4,100<br>(1.7)   | 800<br>(1.5)     |
| Ethylbenzene                           | 208,000<br>(1.2)    | 23,000<br>(1.0)   | 32,000<br>(1.7)   | 8,300<br>(1.6)   | 7,800<br>(1.3)   | 77,000<br>(1.2)   | 46,000<br>(1.2)  | 5,000<br>(1.3)   | 5,700<br>(1.2)   | 800<br>(1.0)     | 3,000<br>(1.2)   | 900<br>(1.6)     |
| Formaldehyde                           | 151,000<br>(0.9)    | 19,000<br>(0.9)   | 12,000<br>(0.6)   | 2,900<br>(0.6)   | 5,800<br>(1.0)   | 63,000<br>(1.0)   | 40,000<br>(1.0)  | 3,200<br>(0.8)   | 3,400<br>(0.7)   | 400<br>(0.6)     | 1,300<br>(0.6)   | 200<br>(0.4)     |
| Asbestos                               | 151,000<br>(0.9)    | 26,000<br>(1.2)   | 22,000<br>(1.1)   | 4,200<br>(0.8)   | 4,800<br>(0.8)   | 52,000<br>(0.8)   | 48,000<br>(0.7)  | 3,700<br>(1.0)   | 5,400<br>(1.1)   | 800<br>(1.1)     | 3,200<br>(1.3)   | 600<br>(1.1)     |
| Ultraviolet radiation, artificial      | 141,000<br>(0.8)    | 15,000<br>(0.7)   | 25,000<br>(1.3)   | 5,300<br>(1.0)   | 5,000<br>(0.8)   | 48,000<br>(0.7)   | 32,000<br>(0.8)  | 3,000<br>(0.8)   | 3,600<br>(0.8)   | 400<br>(0.6)     | 2,300<br>(0.9)   | 200<br>(0.4)     |

\*Data for the Territories was not collected in the Survey of Labour and Income Dynamics, therefore no estimate for shift work prevalence is available.
